# Supplementary material
Source: ML conference proceedings conference paper supplement (https://openreview.net/forum?id=PLskiLUBDW)

Execution Time (s)  $\downarrow$ 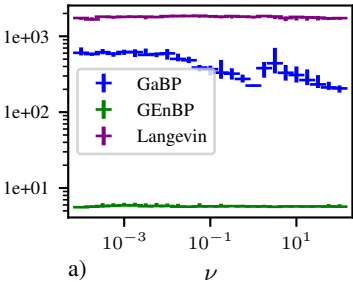Mean-Squared Error  $\downarrow$ 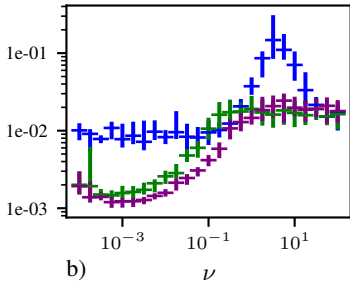Log Likelihood  $\uparrow$ 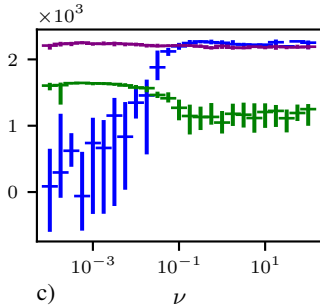

Supplement: supplementary_material [file attachment]

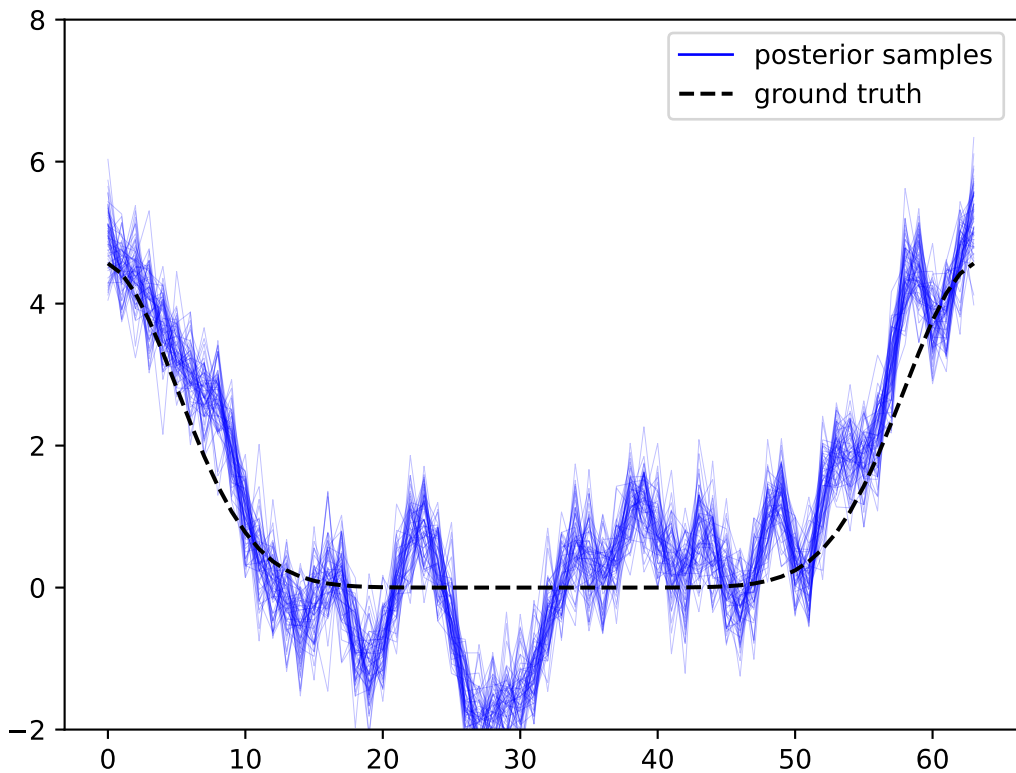

Supplement: supplementary_material [file attachment]

Execution Time (s) ↓

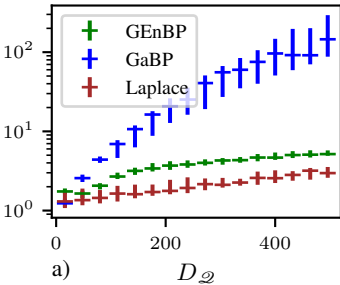

Mean-Squared Error ↓

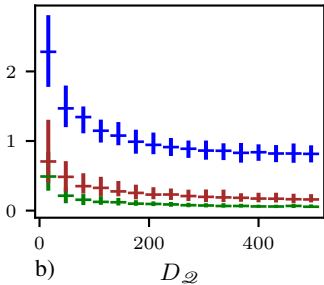

Log Likelihood ↑

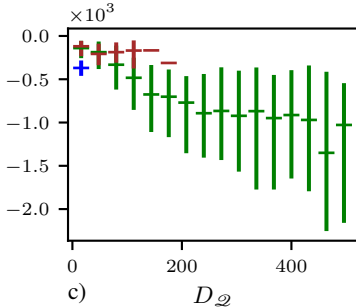

Supplement: supplementary_material [file attachment]

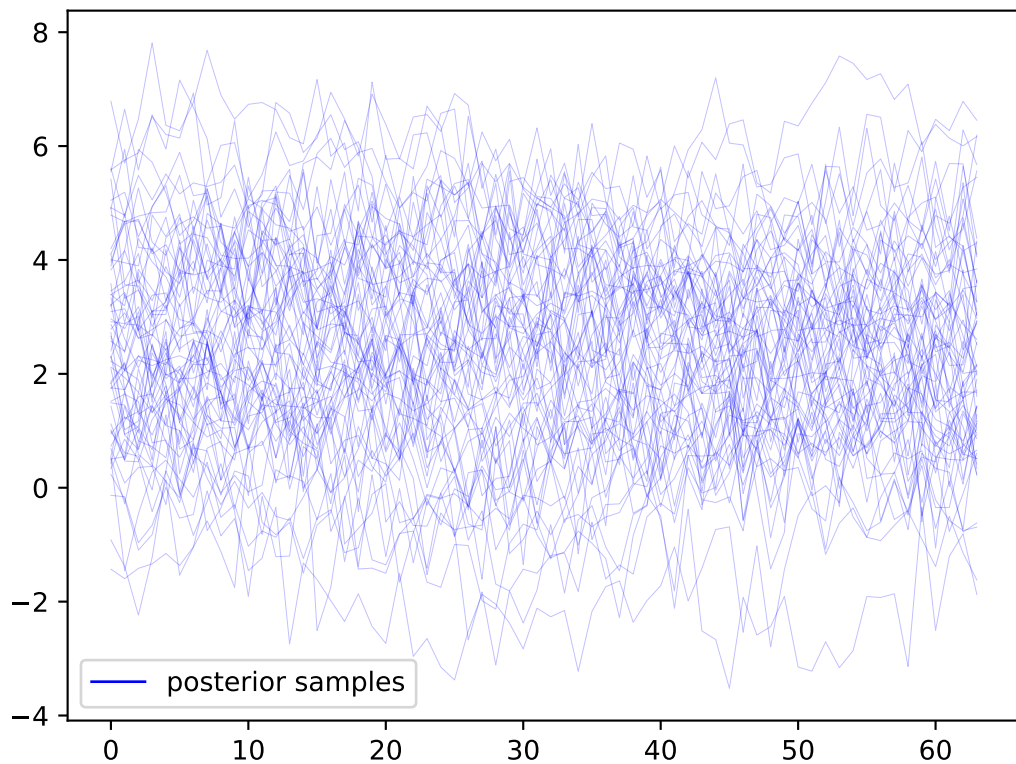

Supplement: supplementary_material [file attachment]
